# Supplementary material for: Patient-derived oral mucosa organoids as an in vitro model for methotrexate induced toxicity in pediatric acute lymphoblastic leukemia
Source: PubMed Central journal article supplement (PMC7233536; doi:10.1371/journal.pone.0231588), 2020-05-18

# Figure S4. Technical details of drug screens performed in this study

A

MTX range concentrations: 5 - 0.05  $\mu$ M in triplicate

| <> | 1         | 2    | 3    | 4    | 5    | 6    | 7    | 8    | 9    | 10   | 11   | 12            | 13   | 14   | 15   | 16   | 17   | 18   | 19   | 20   | 21   | 22   | 23        | 24 |
|----|-----------|------|------|------|------|------|------|------|------|------|------|---------------|------|------|------|------|------|------|------|------|------|------|-----------|----|
| A  |           |      |      |      |      |      |      |      |      |      |      |               |      |      |      |      |      |      |      |      |      |      |           |    |
| B  | Block 1   | 5,00 | 2,99 | 1,79 | 1,09 | 0,64 | 0,38 | 0,22 | 0,13 | 0,08 | 0,05 | Staurosporine | 5,00 | 2,99 | 1,79 | 1,09 | 0,64 | 0,38 | 0,22 | 0,13 | 0,08 | 0,05 | Block 5   |    |
| C  | MTX only  | 5,00 | 2,99 | 1,79 | 1,09 | 0,64 | 0,38 | 0,22 | 0,13 | 0,08 | 0,05 |               | 5,00 | 2,99 | 1,79 | 1,09 | 0,64 | 0,38 | 0,22 | 0,13 | 0,08 | 0,05 | + LV T48h |    |
| D  |           | 5,00 | 2,99 | 1,79 | 1,09 | 0,64 | 0,38 | 0,22 | 0,13 | 0,08 | 0,05 |               | 5,00 | 2,99 | 1,79 | 1,09 | 0,64 | 0,38 | 0,22 | 0,13 | 0,08 | 0,05 |           |    |
| E  | Block 2   | 5,00 | 2,99 | 1,79 | 1,09 | 0,64 | 0,38 | 0,22 | 0,13 | 0,08 | 0,05 | Blanco        | 5,00 | 2,99 | 1,79 | 1,09 | 0,64 | 0,38 | 0,22 | 0,13 | 0,08 | 0,05 | Block 6   |    |
| F  | + LV T0h  | 5,00 | 2,99 | 1,79 | 1,09 | 0,64 | 0,38 | 0,22 | 0,13 | 0,08 | 0,05 |               | 5,00 | 2,99 | 1,79 | 1,09 | 0,64 | 0,38 | 0,22 | 0,13 | 0,08 | 0,05 | + LV T72h |    |
| G  |           | 5,00 | 2,99 | 1,79 | 1,09 | 0,64 | 0,38 | 0,22 | 0,13 | 0,08 | 0,05 |               | 5,00 | 2,99 | 1,79 | 1,09 | 0,64 | 0,38 | 0,22 | 0,13 | 0,08 | 0,05 |           |    |
| H  | Block 3   | 5,00 | 2,99 | 1,79 | 1,09 | 0,64 | 0,38 | 0,22 | 0,13 | 0,08 | 0,05 |               | 5,00 | 2,99 | 1,79 | 1,09 | 0,64 | 0,38 | 0,22 | 0,13 | 0,08 | 0,05 | Block 7   |    |
| I  | + LV T12h | 5,00 | 2,99 | 1,79 | 1,09 | 0,64 | 0,38 | 0,22 | 0,13 | 0,08 | 0,05 |               | 5,00 | 2,99 | 1,79 | 1,09 | 0,64 | 0,38 | 0,22 | 0,13 | 0,08 | 0,05 | + LV T96h |    |
| J  |           | 5,00 | 2,99 | 1,79 | 1,09 | 0,64 | 0,38 | 0,22 | 0,13 | 0,08 | 0,05 |               | 5,00 | 2,99 | 1,79 | 1,09 | 0,64 | 0,38 | 0,22 | 0,13 | 0,08 | 0,05 |           |    |
| K  | Block 4   | 5,00 | 2,99 | 1,79 | 1,09 | 0,64 | 0,38 | 0,22 | 0,13 | 0,08 | 0,05 |               |      |      |      |      |      |      |      |      |      |      |           |    |
| L  | + LV T24h | 5,00 | 2,99 | 1,79 | 1,09 | 0,64 | 0,38 | 0,22 | 0,13 | 0,08 | 0,05 |               |      |      |      |      |      |      |      |      |      |      |           |    |
| M  |           | 5,00 | 2,99 | 1,79 | 1,09 | 0,64 | 0,38 | 0,22 | 0,13 | 0,08 | 0,05 |               |      |      |      |      |      |      |      |      |      |      |           |    |
| N  |           |      |      |      |      |      |      |      |      |      |      |               |      |      |      |      |      |      |      |      |      |      |           |    |
| O  |           |      |      |      |      |      |      |      |      |      |      |               |      |      |      |      |      |      |      |      |      |      |           |    |
| P  |           |      |      |      |      |      |      |      |      |      |      |               |      |      |      |      |      |      |      |      |      |      |           |    |

B

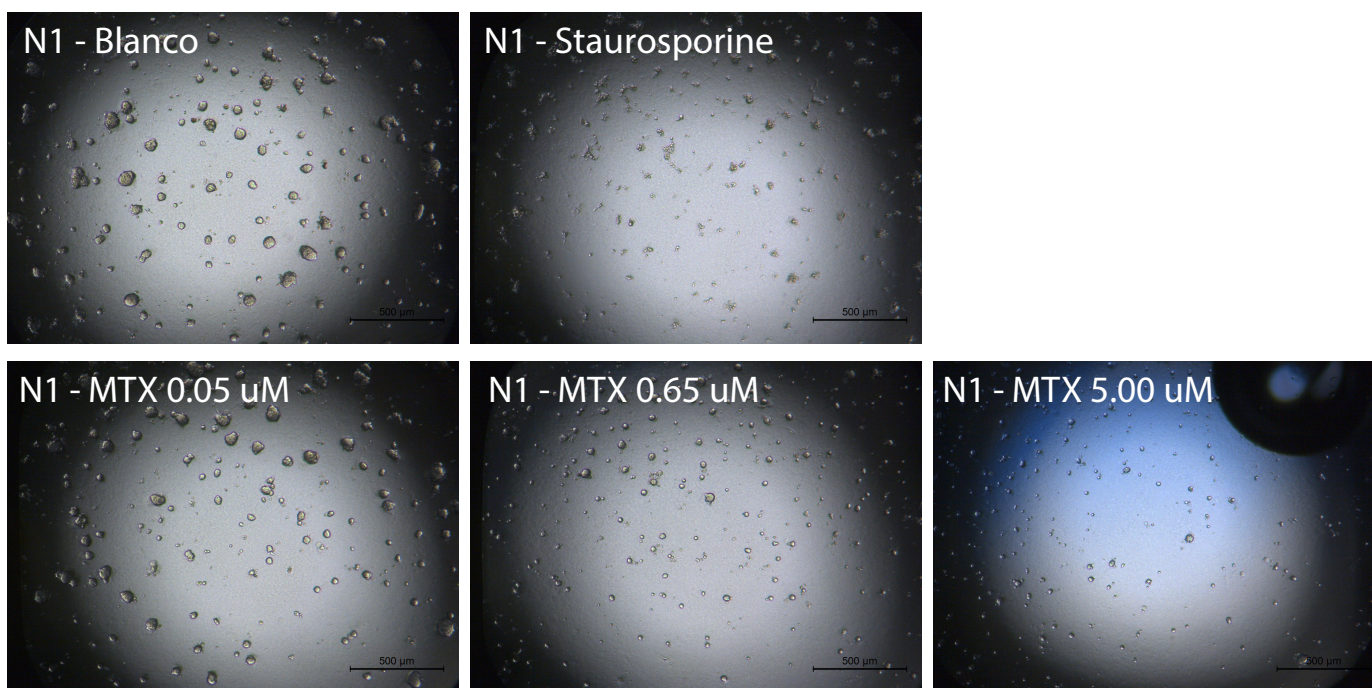

C

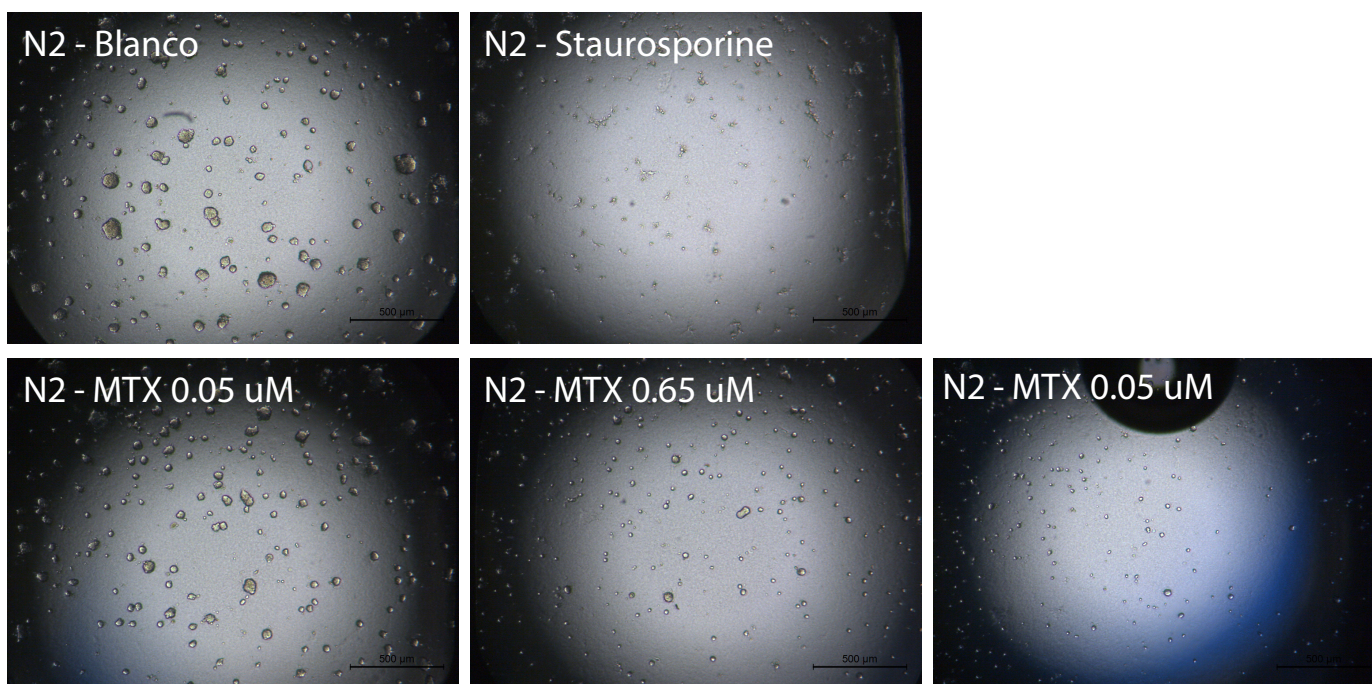

Supplement: pone.0231588.s004.pdf [file pone.0231588.s004.pdf]
