# Supplementary material for: Patient-derived oral mucosa organoids as an in vitro model for methotrexate induced toxicity in pediatric acute lymphoblastic leukemia
Source: PubMed Central journal article supplement (PMC7233536; doi:10.1371/journal.pone.0231588), 2020-05-18

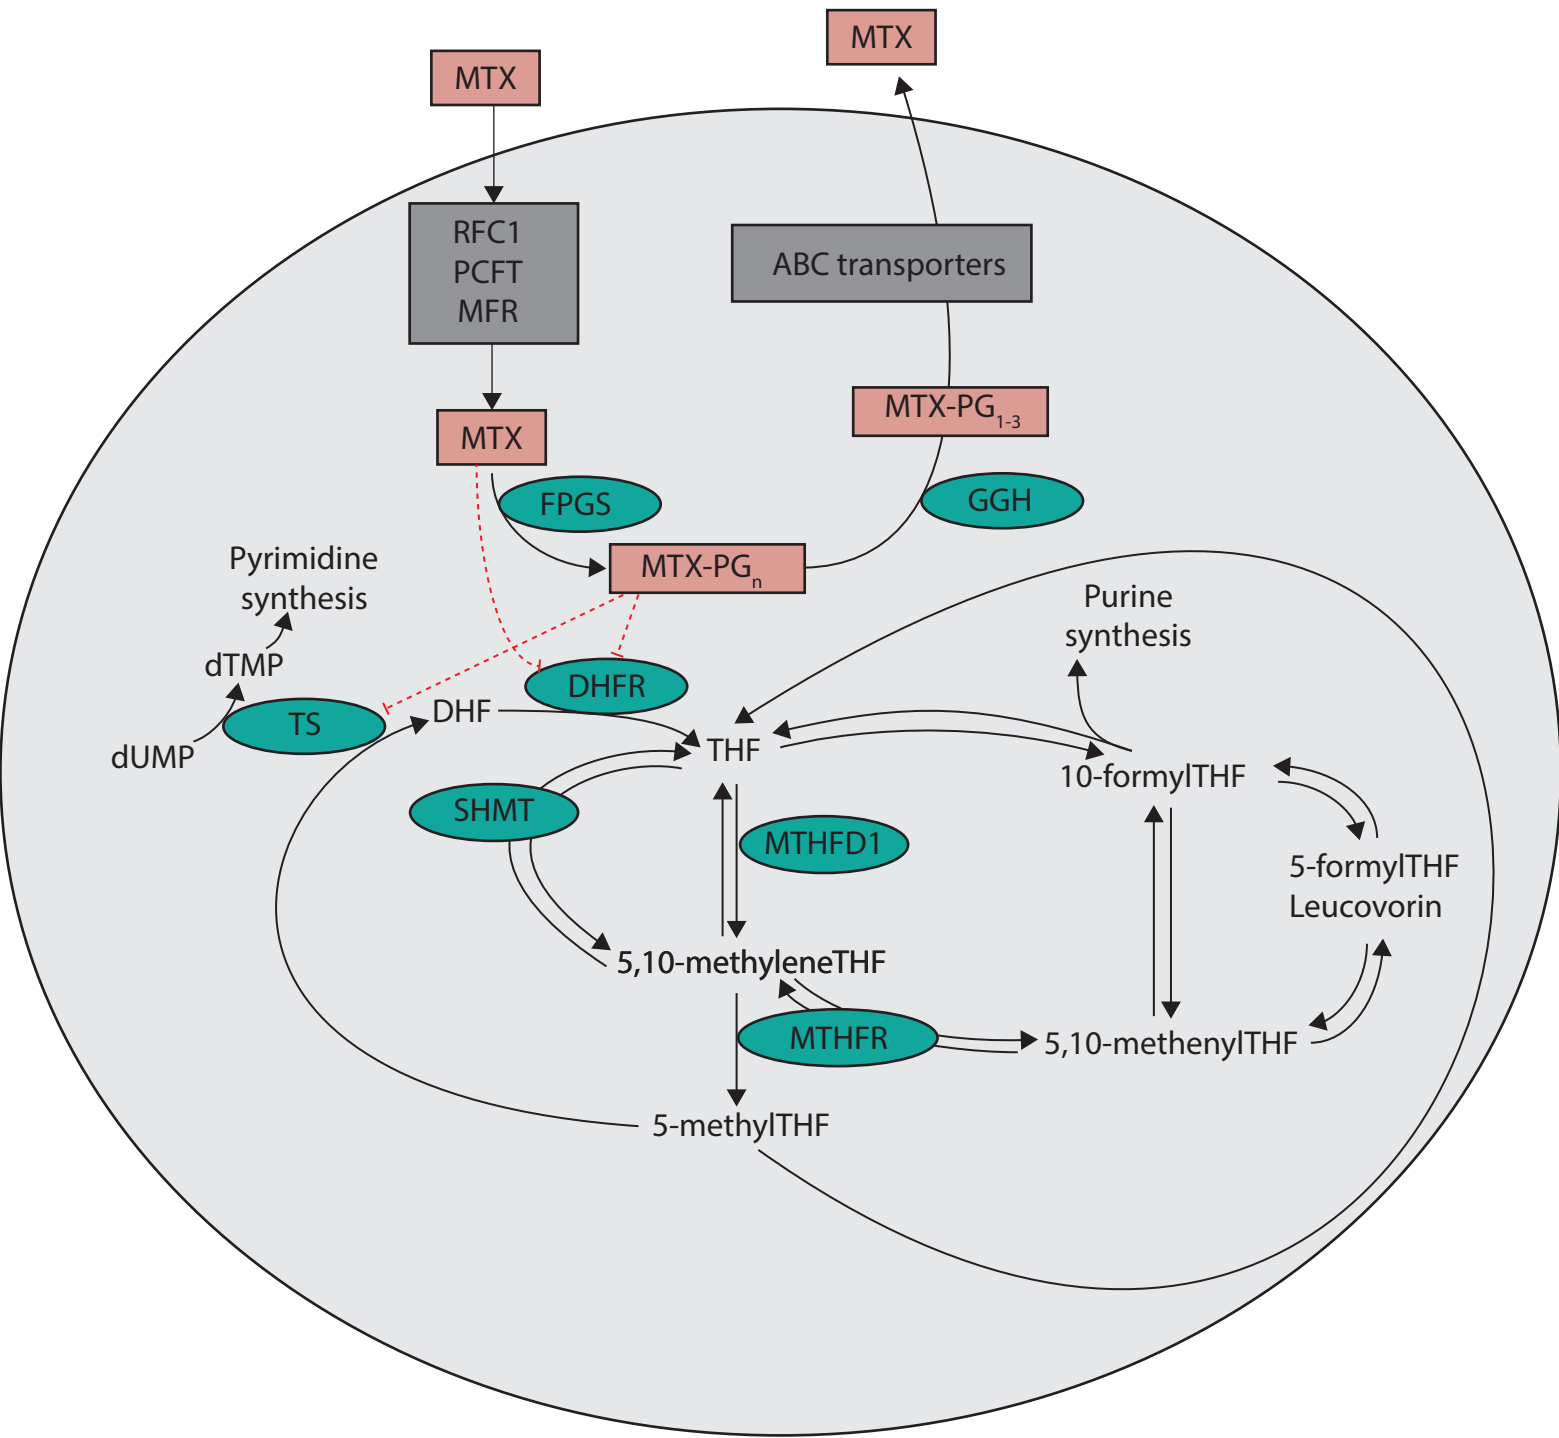

Supplement: pone.0231588.s001.pdf [file pone.0231588.s001.pdf]
