# Supplementary material for: Patient-derived oral mucosa organoids as an in vitro model for methotrexate induced toxicity in pediatric acute lymphoblastic leukemia
Source: PubMed Central journal article supplement (PMC7233536; doi:10.1371/journal.pone.0231588), 2020-05-18
Supplement: pone.0231588.s002.pdf [file pone.0231588.s002.pdf]

Figure S2. Characterization of oral mucosa organoids and the effect of pretreatment on intracellular MTX-PG levels.

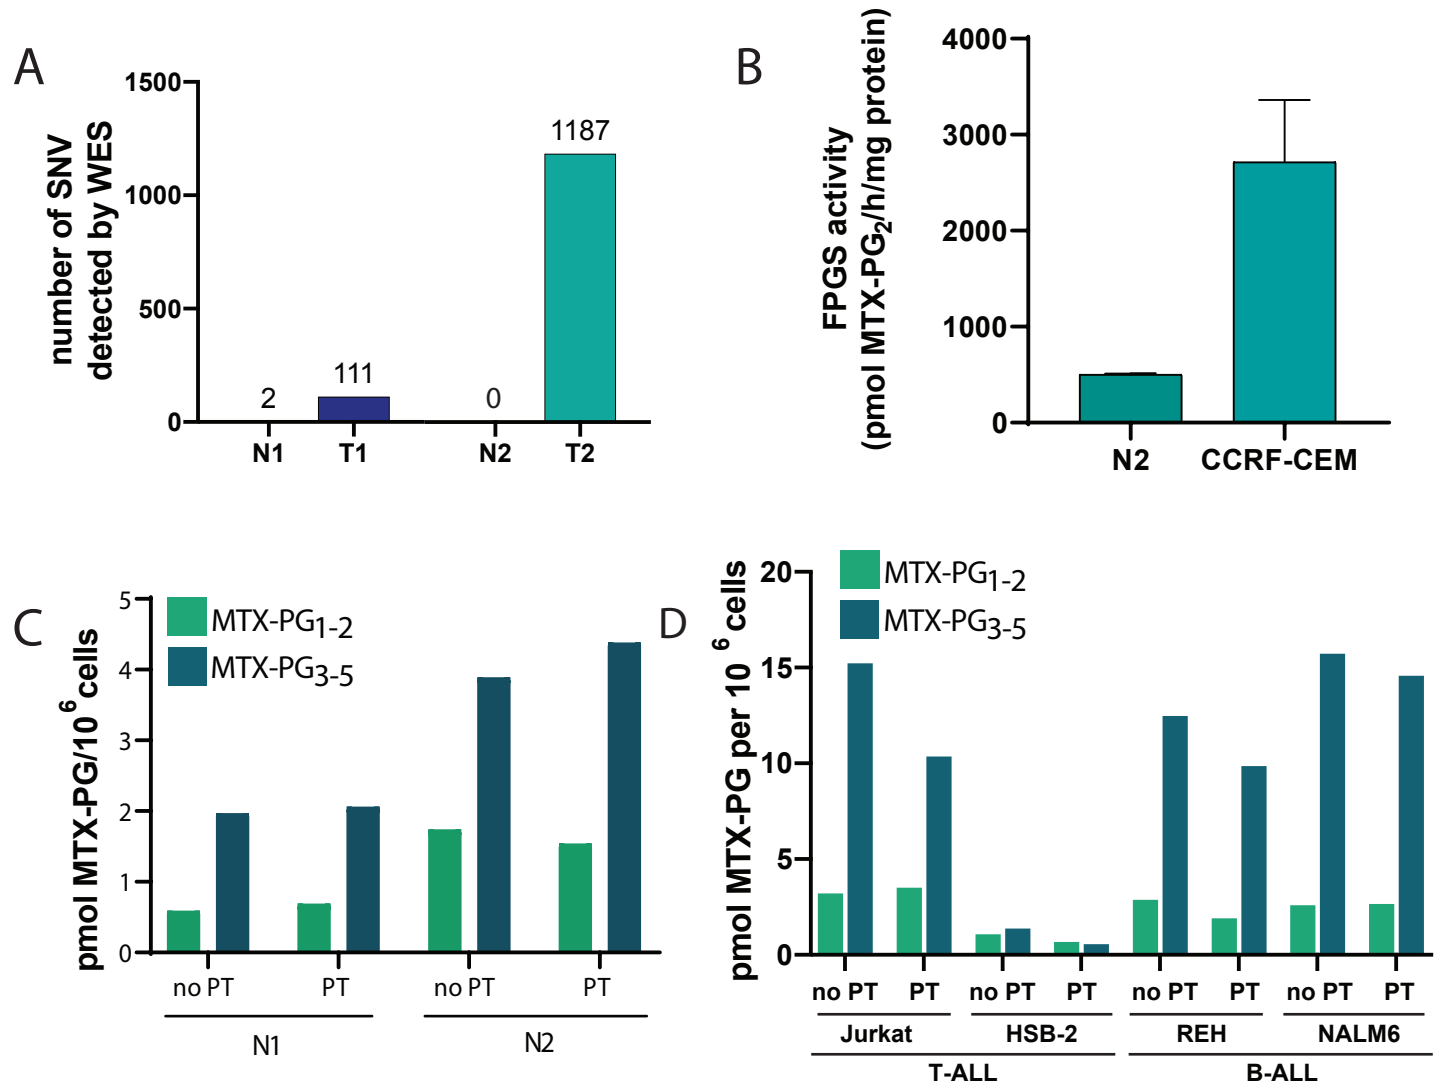

! "# \$ % & ' ( ) \* + , - . / 0 1 2 3 4 5 6 7 8 9 : ;  
 ! ; < , !
