# Supplementary material for: Patient-derived oral mucosa organoids as an in vitro model for methotrexate induced toxicity in pediatric acute lymphoblastic leukemia
Source: PubMed Central journal article supplement (PMC7233536; doi:10.1371/journal.pone.0231588), 2020-05-18
Supplement: pone.0231588.s005.pdf [file pone.0231588.s005.pdf]

Table S1. Clinical information of patients

| <b>name</b> | <b>gender</b> | <b>age at diagnosis</b> | <b>tumor location</b> |
|-------------|---------------|-------------------------|-----------------------|
| N1          | male          | 80                      | parotis SCC           |
| N2          | female        | 70                      | gingiva               |
| N3          | male          | 68                      | larynx                |
| N4          | male          | 65                      | salivary gland SCC    |
| N5          | female        | 60                      | oral cavity           |
