# Supplementary material for: Patient-derived oral mucosa organoids as an in vitro model for methotrexate induced toxicity in pediatric acute lymphoblastic leukemia
Source: PubMed Central journal article supplement (PMC7233536; doi:10.1371/journal.pone.0231588), 2020-05-18
Supplement: pone.0231588.s006.pdf [file pone.0231588.s006.pdf]

**S2 Table**

| <b>Organoid line / Leukemia cell line</b> | <b>Z-scores</b> |        |        |        |
|-------------------------------------------|-----------------|--------|--------|--------|
| N1                                        | 0,6465          | 0,7194 | 0,4499 | 0,3539 |
| N1 - PT                                   | 0,4956          | 0,6276 | 0,3304 | 0,8192 |
| N2                                        | 0,3644          | 0,8923 | 0,8424 | 0,4888 |
| N2 - PT                                   | 0,5608          | 0,7385 | 0,7172 | 0,5921 |
| N3                                        | 0,7360          |        |        |        |
| N3 - PT                                   | 0,9172          |        |        |        |
| N4                                        | 0,6484          |        |        |        |
| N4 - PT                                   | 0,6074          |        |        |        |
| N5                                        | 0,9296          |        |        |        |
| N5 - PT                                   | 0,4788          |        |        |        |
| Jurkat                                    | 0,9285          | 0,8396 | 0,8985 |        |
| Jurkat - PT                               | 0,9782          | 0,9413 | 0,9545 |        |
| NALM6                                     | 0,8172          | 0,7597 | 0,5932 |        |
| NALM6 - PT                                | 0,8708          | 0,9015 | 0,6629 |        |
| REH                                       | 0,9743          | 0,7067 | 0,8949 |        |
| REH - PT                                  | 0,8998          | 0,8019 | 0,6656 |        |
| HSB2                                      | 0,9202          | 0,9193 | 0,8629 |        |
| HSB2 - PT                                 | 0,9312          | 0,8975 | 0,8973 |        |
| MOLT16                                    | 0,8955          | 0,9439 | 0,7531 |        |
| MOLT16 - PT                               | 0,9415          | 0,8294 | 0,6990 |        |
| <b>Median</b>                             | 0,8182          |        |        |        |
| <b>Minimum range</b>                      | 0,3304          |        |        |        |
| <b>Maximum range</b>                      | 0,9782          |        |        |        |
