# Supplementary material for: Patient-derived oral mucosa organoids as an in vitro model for methotrexate induced toxicity in pediatric acute lymphoblastic leukemia
Source: PubMed Central journal article supplement (PMC7233536; doi:10.1371/journal.pone.0231588), 2020-05-18
Supplement: pone.0231588.s008.pdf [file pone.0231588.s008.pdf]

Table S4. Sequences of primers used for quantitative PCR

| primer name | primer sequence                   | length of product |
|-------------|-----------------------------------|-------------------|
| PCFT RT F   | 5'-CACTCTACCCAGCCACTCTGAAC-3'     | 127 bp            |
| PCFT RT R   | 5'-GATCAGCCTTTTCCAGCATCC-3'       |                   |
| RFC F       | 5'-ACCATCATCACTTTTATTGTCTC-3'     | 97 bp             |
| RFC R       | 5'-ATGGACAGGATCAGGAAGTACA-3'      |                   |
| MFT F       | 5'-GCCGTGAGTGATGGATTGGAA-3'       | 102 bp            |
| MFT R       | 5'-TCCTTGATAAAGTCCCCGTAGT-3'      |                   |
| DHFR F      | 5'-ATGCCTTAAAACCTTACTGAACAACCA-3' | 81 bp             |
| DHFR R      | 5'-TGGGTGATTCATGGCTTCCT-3'        |                   |
| TS F        | 5'-TCCCGAGACTTTTTGGACAGC-3'       | 166 bp            |
| TS R        | 5'-TGATGGTGTCAATCACTCTTGC-3'      |                   |
| AICARTF F   | 5'-ACCTGACCGCTCTTGGTTG-3'         | 171 bp            |
| AICARTF R   | 5'-TACGAGCTAGGATCCAGCAT-3'        |                   |
| FPGS F      | 5'-CCGAGCATGGAGTACCAGGA-3'        | 80 bp             |
| FPGS R      | 5'-GCGCTTACCTGCTCCAG-3'           |                   |
| GGH F       | 5'-GCGAGAGTTGTACCAGTAAGGC-3'      | 118 bp            |
| GGH R       | 5'-CATAATCTGAGCGTCTGAGGTC-3'      |                   |
